1 **Opening Pandora's box: high level resistance to antibiotics of last resort in Gram**  
2 **negative bacteria from Nigeria**

3

4

5 David O Ogbolu, PhD<sup>1,2\*</sup>, Laura J V Piddock, PhD<sup>2</sup>, Mark A Webber, MSc, PhD<sup>3,4</sup>

6

7 <sup>1</sup> *Department of Biomedical Sciences, Ladoke Akintola University of Technology,*

8 *Ogbomoso, Osogbo Campus, Nigeria*

9 <sup>2</sup> *Antimicrobials Research Group, Institute for Microbiology and Infection, School of*

10 *Immunity and Infection, University of Birmingham, Edgbaston, Birmingham, B15 2TT,*

11 *UK*

12 <sup>3</sup> *The Quadram Institute, Norwich Research Park, Colney, Norwich, NR4 7UA, UK*

13

14 <sup>4</sup> *Norwich Medical School, Norwich Research Park, Colney, Norwich, NR4 7UA, UK*

15

16 **\*Correspondence:** [doogbolu@lautech.edu.ng](mailto:doogbolu@lautech.edu.ng)

17

18 **Keywords:** Carbapenem, Antibiotic resistance; Sub-Saharan Africa; Genomics;

19 Sequencing

20

21 Running title: extreme MDR in Nigeria

22

23 **ABSTRACT**

24 Antimicrobial resistance (AMR) is a global problem but information about the  
25 prevalence and mechanisms of resistance in sub-Saharan Africa are lacking. We  
26 determined the percentage of drug resistant isolates and resistance mechanisms in 307  
27 Gram negative isolates randomly collected from south western Nigeria. Susceptibility  
28 testing revealed 78.1%, 92.2% and 52.6% of all isolates were resistant to  
29 fluoroquinolones, third generation cephalosporins and carbapenems respectively. There  
30 were more resistant isolates from the stools of uninfected patients than from specimens  
31 of patients with symptoms of infections. Only a small proportion of *E. coli* (10%) and  
32 *Klebsiella* (7%) isolates produced a carbapenemase. Whole genome sequencing of  
33 selected isolates identified the presence of globally disseminated clones. This depicts a  
34 crisis for the use of first line therapy in Nigerian patients, it is likely that Nigeria is  
35 playing a significant role in the spread of AMR due to her high population and mobility  
36 across the globe.

37

## 38 INTRODUCTION

39 Nigeria and other sub-Saharan African countries face an increasing number of  
40 healthcare associated infections caused by multi-drug resistant (MDR) Gram-negative  
41 bacteria[1, 2]. Pathogenic species have evolved resistance to multiple antimicrobial  
42 agents including the mainstays of treatment[3, 4]. This is of particular concern as there  
43 are few new antibiotics in development with activity against Gram-negative bacteria[5].  
44 Whilst Gram-negative bacteria are often intrinsically more resistant to many antibiotics  
45 than Gram-positive species, drug resistance to the most clinically important antibiotics  
46 is largely mediated by genes which are transmitted on plasmids that can readily spread  
47 through bacterial populations[6]. Species belonging to the *Enterobacteriaceae* family  
48 are the most commonly isolated MDR bacteria causing healthcare associated infections  
49 globally including in sub-Saharan Africa[7]. These bacteria include extended-spectrum  
50  $\beta$ -lactamase (ESBL) producing *K. pneumoniae* and *E. coli* which are associated with  
51 both hospital and community infections with very high mortality rates[8, 9].  
52 Carbapenems have become a mainstay of therapy for the treatment of ESBL producing  
53 Gram-negative bacteria. This has led to an increase in carbapenem use for treatment of  
54 serious infections[10]. As a result, there has been a selective pressure for carbapenem  
55 resistance and carbapenem resistant strains have spread globally [11](11). Worryingly,  
56 carbapenem-resistant bacteria are often resistant to other classes of antibiotics including  
57 aminoglycosides, fluoroquinolones and other  $\beta$ -lactams, with often colistin and  
58 tigecycline as the only effective drugs. Resistance to both these antibiotics can also  
59 easily evolve making them unreliable as ‘last resort’ therapies[12, 13].  
60 Mechanisms of carbapenem resistance include production of carbapenemase enzymes  
61 and/or repression of porins to limit entry of these drugs into the bacterial cell.

62 Carbapenemases belong to different enzyme families including the metallo-  
63 carbapenemases (including the NDM and VIM enzymes) or non-metallo-types  
64 (including the KPC and OXA-48 enzymes)[14]. Some of these enzymes are associated  
65 with a particular species, for example the '*Klebsiella Pneumoniae* Carbapenemase' or  
66 'KPC' enzymes are typically found in *K. pneumoniae* species[15]. Other enzymes, such  
67 as NDM are found in many species [16].

68 Nigeria is often referred to as the "Giant of Africa", owing to its large population and  
69 economy with approximately 182 million inhabitants, by far the largest in Africa. The  
70 Nigerian population is highly mobile and over 70% of Nigerians are under the age of  
71 50. The large size and high level of mobility of this population makes import and export  
72 of antibiotic resistant bacteria a real concern for both Nigeria, but also the wider global  
73 community. Gram-negative bacteria cause a significant number of infections in  
74 Nigerian hospitals and represent the majority of isolates from both wounds and urinary  
75 tract infections; these form the largest group of clinical specimens received in Nigerian  
76 clinical microbiology laboratories[1]. Carbapenem-resistant Gram-negative bacteria  
77 have become prevalent in many parts of the world including Nigeria and sub Saharan  
78 Africa. However, to our knowledge there are few data and no organized antimicrobial  
79 resistance (AMR) surveillance networks for Africa. Recently, we showed that  
80 carbapenem resistant bacteria are present in Nigeria. The details of the strains with this  
81 phenotype and the mechanisms of resistance have not been studied in detail [3, 4](3,4).  
82 The potential role of the Nigerian population in the global spread of antibiotic resistance  
83 is great but the local situation is not understood. We determined a retrospective analysis  
84 of percentage resistance and resistance mechanisms in clinical and commensal isolates  
85 of Gram negative bacteria.

## 86 **METHODS**

### 87 **Sample sites and bacterial isolates**

88 The majority of the Nigerian population is found in the southwest of the country; this is  
89 also where major transportation hubs are located. Gram negative bacterial isolates for  
90 this study were recovered from patients admitted to three large teaching hospitals  
91 located in three states of south western Nigeria from a range of clinical specimens with  
92 invasive and colonized infections (Table 1, and Figure 1). The Olabisi Onabanjo  
93 University Teaching Hospital (OOUTH) is a 185-bed tertiary health care center and  
94 major referral center for Ogun State. The University College hospital (UCH) is  
95 in Ibadan in Oyo state and has 850 beds. The Obafemi Awolowo University Teaching  
96 Hospitals Complex (OAUTHC) is a teaching hospital with 535 beds and is in Osun  
97 state.

98 In addition, isolates from stool samples sent for routine examination from patients but  
99 without infection were also collected. Isolates were non-duplicate and unbiased (i.e. no  
100 selective criteria beyond being a Gram negative bacterial species were applied) and  
101 were randomly collected from the hospital laboratories in 2011 and 2013. A total of 306  
102 isolates were retained and no information about the antibiotic susceptibility of any  
103 isolates was used as an inclusion criterion. The isolates comprised *E. coli*, *Klebsiella*  
104 spp, *Pseudomonas aeruginosa*, *Proteus* spp and others (*Serratia* and *Citrobacter* spp, ).  
105 Species assignments were confirmed for all isolates using standard biochemical tests  
106 and API 20E strips (BioMérieux, Basingstoke, UK) for Enterobacteriaceae.

### 107 **Antibiotic susceptibility testing**

108 Susceptibility of all isolates to a panel of antibiotic classes commonly used in these  
109 hospitals such as fluoroquinolones, third generation cephalosporins and carbapenem

110 were determined by the disk diffusion method on Mueller–Hinton agar using antibiotic  
111 disks from Oxoid Ltd. (Basingstoke, UK) according to the recommendations of  
112 EUCAST and interpreted according to EUCAST breakpoints[17]. All susceptibility  
113 testing experiments included the control organisms *E. coli* NCTC 10418 and *P.*  
114 *aeruginosa* NCTC 10662.

### 115 **Identification of carbapenemase production**

116 The Enterobacteriaceae isolates were tested for production of a carbapenemase using  
117 the disc based ‘Carbapenemase detection set’ from Mast Group (Bootle, UK) and  
118 interpreted using the ‘carbapenemase detection set calculator’ tool as per the  
119 manufacturers guidelines.

### 120 **Identification of known carbapenemase genes**

121 PCR and sequencing were used to identify genes encoding various known beta-  
122 lactamases (including carbapenemases, NDM, VIM, KPC and GES). Primers used are  
123 shown in Table S1 having previously extracted DNA by crude boiling method.

### 124 **RAPD PCR**

125 A random amplified polymorphic DNA typing approach was used for each species as a  
126 rapid and inexpensive way to assess the diversity of strains within each population.  
127 Primers and conditions are given in Table S1.

### 128 **Whole genome sequencing and bioinformatics**

129 To characterise the strain types, plasmid content and nature of drug resistance genes  
130 present in the collection, 10 isolates (due to paucity of fund) were selected for whole  
131 genome sequencing based on their antimicrobial profiling, carbapenemase production,  
132 genotypes, clinical specimen and source and species. DNA was extracted with the  
133 QIAamp DNA Mini Kit according to manufacturer instruction. Paired-end Illumina

134 sequencing was used to generate high-quality 250 bp reads. Assembly used Velvet [18]  
135 and contigs were re-ordered against relevant reference genomes using MAUVE[19].  
136 Assemblies were annotated using RAST (<http://rast.nmpdr.org/rast.cgi>). Assemblies  
137 were used to search for plasmid content and to determine MLST types using the  
138 ‘PlasmidFinder’ and ‘MLST’ tools hosted at the Centre for Genomic Epidemiology  
139 (<https://cge.cbs.dtu.dk/services/PlasmidFinder> and  
140 <http://cge.cbs.dtu.dk/services/MLST>). The ‘Comprehensive Antibiotic Resistance  
141 Database’, CARD was searched to identify antibiotic resistance genes[20]. Specific  
142 assembly of plasmids was attempted using ‘plasmidSPAdes’ and plasmid content  
143 identified by plasmid network reconstruction using ‘PLACNET’  
144 (<http://castillo.dicom.unican.es/request/>)[21]. When necessary, reads were mapped  
145 against assemblies using Bowtie [22] and visualized in Artemis[23].  
146  
147

148 **RESULTS**

149 **Antimicrobial resistance in the 307 Nigerian isolates**

150 The percentage of the entire collection of 306 isolates that were resistant to  
151 fluoroquinolones, third generation cephalosporins and carbapenems being 78.1%,  
152 92.2% and 52.3%, respectively (Tables 2 and 3). This pattern of high numbers of  
153 clinical isolates being resistant to these classes of drug was very similar in all three  
154 study sites (fluoroquinolone resistance was seen in 75 - 83% of isolates, cephalosporin  
155 resistance in 90 - 100% of isolates and carbapenem resistance in 50 - 55% of isolates).  
156 Of concern was the observation that the percentage of isolates from stool of uninfected  
157 patients, i.e. those being carried as commensal bacteria that were resistant to third  
158 generation cephalosporins (100%) and carbapenems (69.1%) was higher than in isolates  
159 from patients being treated for an infection. This suggests that extremely high numbers  
160 of antibiotic resistant bacteria are prevalent in the community and that multidrug  
161 resistance is not restricted to isolates found in the hospital environment.  
162 When stratified by species, *E. coli* were most commonly resistant to third generation  
163 cephalosporins (93.7%) and carbapenems (59.4%), followed by *Pseudomonas* species  
164 (where 91.7% of isolates were resistant to third generation cephalosporins and 51.7% of  
165 isolates were resistant to carbapenems) (Tables 2, 3 and 4). Of the 307 isolates, no  
166 species had 50% or more of isolates which were sensitive to all three classes of  
167 antibiotic. The isolates of *Proteus* (n=24) were least likely to be carbapenem resistant;  
168 nonetheless 48% of isolates were resistant to this class of drug.  
169 The isolates in this study were collected in two different years, the percent of  
170 fluoroquinolone resistant isolates in 2011 and 2013 was very similar. However, between  
171 the two years the percentage of isolates resistant to cephalosporins fell from 97% to



172 87% and the percentage of carbapenem resistant isolates fell from 59% to 43% (Table  
173 1).

#### 174 **Typing of isolates**

175 RAPD PCR was used to type 54 of 306 isolates representing 18 each of *E. coli*, *K.*  
176 *pneumoniae* and *P. aeruginosa*. A wide variety of strains were present for each species  
177 with only a small number of repeated patterns observed e.g. Figure 2 where 13 RAPD  
178 patterns were identified from 18 isolates of *E. coli* demonstrating a lack of dominance  
179 by specific clones.

#### 180 **Carbapenemase production and identification of carbapenemase genes**

181 As there was a high prevalence of carbapenem resistance in the isolates, the *E. coli* and  
182 *Klebsiella* strains were tested for production of carbapenemases using the  
183 ‘carbapenemase detection set’ from Mast Group (Bootle, UK). Only 6% of all isolates  
184 produced a carbapenemase (7% of *Klebsiella* and 10% of *E. coli*). Specific  
185 carbapenemase genes were amplified by PCR and genes verified by DNA sequencing  
186 alleles for all 306 isolates. In agreement with the phenotypic testing, only 19 of the 306  
187 isolates (6.2%) carried a known carbapenemase gene. The PCR revealed the presence of  
188 variants of VIM (n=9), GES (n=10) and NDM (n=2) families. These genes were  
189 detected in *K. pneumoniae* (n=6), *E. coli* (n=4) and *P. aeruginosa* (n=9) isolates. Two  
190 isolates carried two carbapenemase genes (NDM and VIM and GES and VIM). The  
191 KPC, IMP or OXA-48 genes were not detected in any isolate.

192 As 51.3% (157 isolates) of the 306 isolates were resistant to carbapenems but most did  
193 not appear to produce a known carbapenemase the presence of other known resistance  
194 mechanisms was investigated. The CTX-M genes have been shown to be very common  
195 and important in Gram negative isolates among other extended-spectrum  $\beta$ -lactamases

196 around the world, we therefore used primers specific for each of the CTX-M sub-groups  
197 were used to detect these genes. Of the 218 *E. coli* and *K. pneumoniae* isolates, 79.4%  
198 (173) contained a CTX-M allele; DNA sequencing of a random selection of 40 isolates  
199 revealed all to be CTX-M-15. None of these isolates demonstrated de-repression of  
200 efflux but all showed either complete loss or reduced production of outer membrane  
201 porins (data not shown).

### 202 **Characterisation of antibiotic resistance mechanisms and strain types in** 203 **representative isolates**

204 To investigate the molecular basis of drug resistance ten isolates were chosen for whole  
205 genome sequencing. These included representative isolates of the most common species  
206 and resistance phenotypes present in the collection. The ten isolates included two *K.*  
207 *pneumoniae*, two *E. coli*, three *P. aeruginosa*, two *P. mirabilis* and one *P. rettgeri*  
208 isolate (Table 4). The choice of isolate was informed by susceptibility testing, year of  
209 isolation, site of isolation (both geographical and specimen type) and by results of  
210 random amplified polymorphic DNA (RAPD) typing. The sequencing identified some  
211 globally established strain types in circulation in Nigeria, notably *K. pneumoniae* ST11  
212 and *P. aeruginosa* ST224.

213 Both the *K. pneumoniae* isolates belonged to ST11 and were from urine of different  
214 patients in 2011 from UCH. Both genome assemblies were essentially identical and  
215 both carried NDM-1 and CTX-M-15 (Table 4). In addition, both isolates also carried  
216 OXA-1 and SHV-11. Interestingly, there was direct evidence for the mobility of the  
217 NDM-1 gene in this strain. Whilst the gene encoding NDM-1 was detected by PCR  
218 using a boiled colony preparation as a template in both isolates (U52 and U37), in both  
219 genome assemblies created after sequencing isolated DNA preparations, it was only

220 initially seen in the genome assembly for U52. Analysis of the genetic location of this  
221 gene showed it to be present in a context like that seen by others previously, in an  
222 operon with *bleMBL* and associated with *trpF*, *dsbC* and *cutA* (Figure 3). In isolate U37  
223 this region was absent and no sequence reads mapped against the U52 reference (Figure  
224 S1) demonstrating likely mobility of this whole region as has been suggested previously  
225 [24]. Both IncFIB and FII plasmid replicons were present in both strains supporting a  
226 plasmidic context for *bla*NDM-1 (Figure 3). In addition to the beta-lactamase genes,  
227 both isolates also carried trimethoprim (*dfrA12*), macrolide (*mphA*) aminoglycoside  
228 (*rmtF*) chloramphenicol (*cat*) and sulphonamide (*sulI*) resistance genes. Consistent with  
229 fluoroquinolone resistance, mutations in *gyrA* were seen,

230 One of the *P. aeruginosa* belonged to ST244 and carried the mutant PDC-1 AmpC  
231 enzyme as well as genes that contribute to resistance to chloramphenicol (*cmx*, *catB7*),  
232 aminoglycosides (*aph(3'')-II*, *aph(6)-Id*) and fosfomycin (*fosA*). The other two isolates  
233 were both members of ST233 and both carried PDC-3. These latter two isolates also  
234 carried VIM-2 and OXA-33, were of the same MLST type and both isolated from  
235 OOUTH although isolated two years apart. Reads from the F46 strain carrying VIM-2  
236 were assembled using both Velvet and SPAdes (using the plasmidSPAdes option); both  
237 resulted in assemblies with the VIM-2 gene present on a contig of ~7000bp. When this  
238 sequence was compared with known sequences in Genbank using the BLAST algorithm  
239 a perfect match for an integron carrying VIM-2 was found (accession number  
240 KT768111.1). Figure 3 shows a plasmid network reconstruction and the genetic context  
241 of the VIM-2 genes in these two isolates.

242 The two *E. coli* strains sequenced belonged to ST226 and ST156. Neither carried known  
243 carbapenemase genes although both had multiple mutations within *ampD* suggesting de-

244 repression of the chromosomal *ampC* gene. Both strains also carried TEM-1 and various  
245 other mobile resistance genes including genes conferring aminoglycoside resistance  
246 (*aph(6)-Id*, *aph(3'')-II*). An IncFII plasmid replicon was present in isolate S46 (the  
247 ST226 isolate).

248 Two *P. mirabilis* strains were sequenced, isolate F10 carried two CMY genes; CMY-41  
249 reported once previously in a *Citrobacter freundii* isolated from food in Egypt [25] and  
250 CMY-31 previously reported in *Klebsiella* and *Salmonella*[26. 27]. A Q1 plasmid  
251 replicon was present in F10. This isolate also carried two separate aminoglycoside  
252 resistance genes (*aadA5*, *aph(3'')-II*), as well as chloramphenicol (*catI*), sulphonamide  
253 (*sulI*) and plasmidic quinolone resistance genes (*qnrA1*). *P. mirabilis* isolate F56 was  
254 found to carry a novel CMY enzyme with a single substitution (of glutamic acid for  
255 aspartic acid at codon 144) distinguishing this protein from CMY-48 isolated from *C.*  
256 *freundii*. Isolate F56 also carried a chloramphenicol acetyltransferase gene (*catI*) and  
257 three aminoglycoside resistance genes (*aadA5*, *aph(3'')-II* and *aph(6)-Id*).

258 The *Providencia* isolate (S39) sequenced carried an SRT-2 AmpC beta-lactamase  
259 variant; this has previously been described in *Serratia marcescens* [28]. No other beta-  
260 lactamase genes or plasmid replicons were detected in this isolate.

261

262 **DISCUSSION**

263 This study suggests that there is a very high prevalence of antibiotic resistance in  
264 Nigerian isolates of Gram-negative bacteria to three key classes of antibiotic. A high  
265 frequency of resistance to fluoroquinolones and cephalosporins have been seen in other  
266 areas of the world increasing the reliance on carbapenems for the treatment of infections  
267 caused by Gram negative bacteria. In this study over 50% of the Nigerian isolates in our  
268 collection were carbapenem-resistant; empiric use of these antibiotics for the treatment  
269 of serious infections is unlikely to be effective. Resistant isolates appear to be widely  
270 spread in the community and were not restricted to hospital patients. Isolates from stools  
271 of healthy individuals were more likely to be resistant to all three classes of antibiotic  
272 tested than those from clinical samples suggesting that the wider Nigerian population  
273 commonly carry resistant isolates including carbapenem resistant isolates at a high  
274 frequency. From our data, resistance to major antibiotics would appear to be the norm in  
275 Gram negative bacteria carried in the Nigerian population.

276 Characterisation of the mechanisms of carbapenem resistance in our collection of  
277 isolates showed that some well-known and globally disseminated carbapenemase genes  
278 are in circulation within Nigeria. These included NDM, VIM and GES enzymes.

279 However, less than 10% of the isolates in the study carried a known carbapenemase  
280 (according to both molecular and phenotypic testing) and none carried KPC or OXA  
281 family carbapenemases. A recent report from Edo state, (in south Nigeria, further east  
282 from the locations in this study) has reported the existence of OXA family  
283 carbapenemases of OXA-48 and OXA-181 and NDM-1[29]. Carbapenem antibiotics  
284 are available in Nigeria but have historically not been widely used in hospital medicine  
285 as they have not been part of the common antibiotic formulary. In most Nigerian

286 hospitals third generation cephalosporins, aminoglycosides and fluoroquinolones are the  
287 most prescribed antibiotics. There was essentially pan-resistance to the cephalosporins  
288 and fluoroquinolones in the isolates. The high level of phenotypic resistance to  
289 carbapenems in this collection could be caused by the carriage of currently  
290 carbapenemases that were not detectable by the methods used. However, we  
291 hypothesize that the very high frequency of carriage of ESBLs (~80% of isolates of  
292 Enterobacteriaceae contained CTX-M variants) and AmpC variants in combination with  
293 porin loss (in *Pseudomonas* isolates) selected by prolonged and heavy cephalosporin  
294 usage are the cause of carbapenem resistance in these isolates. A recent study described  
295 Enterobacteriaceae isolates from the USA which were carbapenem resistant without  
296 carriage of known carbapenemases) [30](30).

297 This study covered the South West of Nigeria, where the population density of the  
298 country is highest with approximately 50 million people. The study area included major  
299 population centers close to other major cities with a diverse population in terms of  
300 culture, race, religion and social standing. The major international transportation hubs of  
301 Nigeria are also in the South West of the country and over 15,000 international flights  
302 leave annually to over 30 different countries and over 8 million passengers fly through  
303 Nigeria annually [31]. International destinations are varied with Europe and the Middle  
304 East being most common followed by destinations in Asia with a smaller number of  
305 flights departing to North and South America [31].

306 Whilst local antibiotic use is likely to have made an impact on the incidence of  
307 antibiotic resistance in the collection of isolates, globally disseminated strain types and  
308 resistance genes were identified. This is highly relevant given the mobility of the  
309 Nigerian population and the implications for this mobility in global transfer of strains

310 and genes. For example, a recent case report documents a Canadian visitor who suffered  
311 a lower leg fracture requiring surgical repair in Nigeria and was repatriated two months  
312 later with a wound infected with *Klebsiella*, *Pseudomonas* and *E. coli* isolates all  
313 carrying carbapenemases[32].  
314 *K. pneumoniae* strains belonging to ST11 were detected; these have been associated  
315 with the carriage of CTX-M-15 and KPC enzymes, mainly in China. ST11 is also a  
316 single locus variant from ST258 which has been associated with the international  
317 dissemination of KPC enzymes on the pKPQIL plasmid[15]. ST258 isolates have also  
318 been recently associated with NDM carriage in India, Sweden and the United  
319 Kingdom[33]. In this study, *E. coli* ST226 was recovered from an uninfected patient;  
320 this strain type has been found circulating in highly resistant diarrhoeagenic *E. coli* in  
321 China. The other *E. coli* ST identified, ST156, has previously been found in  
322 Bangladesh[34], and in NDM-1 carrying clinical isolates of *E. coli* from the UK[35].  
323 *P. aeruginosa* clone ST233 has been described as a dominant international 'high-risk  
324 clone' amongst metallo- $\beta$ -lactamase-producing *P. aeruginosa* and two VIM-2 positive  
325 isolates were found in patients in this study. Isolates of this sequence type have been  
326 seen in the UK[16], and have also been reported previously as carrying VIM-2 or IMP-1  
327 in Norway (in an isolate thought to be imported from Ghana)[36], Japan[37], and South  
328 Africa[38]. The other *P. aeruginosa* sequence type identified in this study (ST244) is a  
329 globally disseminated *P. aeruginosa* clone identified in several countries, including  
330 Poland[39], Brazil[40], Spain[41], South Korea[42], the Czech Republic[43],  
331 Greece[44], Russia[45], China [46] and Tanzania[47]. ST244 isolates have been found  
332 to carry various carbapenemases including IMP and VIM enzymes as well as extended-  
333 spectrum  $\beta$ -lactamases, such as PER-1 and VEB-1[39, 48].

334 This study demonstrates that antibiotic resistance in Gram-negative bacteria in Nigeria  
335 is common place and compromises the effectiveness of the mainstays of broad spectrum  
336 empirical therapy. Perhaps most worryingly, this does not appear to be a problem  
337 restricted to hospital patients with resistance rates in commensal isolates being carried  
338 commensally equally high. The establishment of a reservoir of resistant strains and  
339 resistance genes has occurred in Nigeria and this reservoir is likely to be mobilised  
340 globally. Our data underpin the urgent requirements for enhanced surveillance of drug-  
341 resistance in sub-Saharan Africa and the need for interventions to minimise the selection  
342 and transmission of antibiotic resistant Gram-negative bacteria.

343

344

345

346

347



348 **Acknowledgements**

349 We thank the staff within the laboratories of the study site hospitals for help in  
350 collection of the isolates used in this study.

351 **Funding**

352 DO received support as a Newton International fellowship from the Royal Society.

353 **Biographical Sketch**

354 Dr David Ogbolu was born in Ibadan, Nigeria, Africa's second largest city. After  
355 graduating and working as a Biomedical Scientist in 1997 with a specialism in Medical  
356 Microbiology he completed a masters degree and subsequently PhD studying  
357 mechanisms of antibiotic resistance in Nigerian bacteria. In 2011, David was awarded a  
358 Newton Fellowship from the Royal Society to continue his studies and further  
359 collaborations with colleagues in the UK. David is now a Senior Lecturer at Ladoko  
360 Akintola University of Technology.

361

362 **References**

- 363 1. Akinkunmi EO, Adesunkanmi A-R, Lamikanra A. Pattern of pathogens from  
364 surgical wound infections in a Nigerian hospital and their antimicrobial  
365 susceptibility profiles. *Afr Health Sci.* 2014 Dec;14(4):802–9.
- 366 2. Nwankwo EO, Mofolorunsho CK, Akande AO. Aetiological agents of surgical  
367 site infection in a specialist hospital in Kano, north-western Nigeria. *Tanzan J*  
368 *Health Res.* 2014 Oct;16(4):289–95.
- 369 3. Ogbolu DO, Daini O a, Ogunledun a, Alli a O, Webber M a. High levels of  
370 multidrug resistance in clinical isolates of Gram-negative pathogens from  
371 Nigeria. *Int J Antimicrob Agents.* Elsevier B.V.; 2011 Jan;37(1):62–6.

- 372 4. Ogbolu DO, Webber MA. High-level and novel mechanisms of carbapenem  
373 resistance in Gram-negative bacteria from tertiary hospitals in Nigeria. *Int J*  
374 *Antimicrob Agents*. 2014 May;43(5):412–7.
- 375 5. O'Neill J. Tackling drug-resistant infections globally: final report and  
376 recommendations the review on antimicrobial resistance. 2016; doi.  
377 10.1016/j.jpha.2015.11.005
- 378 6. Blair JMA, Webber MA, Baylay AJ, Ogbolu DO, Piddock LJV. Molecular  
379 mechanisms of antibiotic resistance. *Nat Rev Microbiol*. Nature Publishing  
380 Group; 2011;47(14):4055–61.
- 381 7. Mshana SE, Matee M, Rweyemamu M. Antimicrobial resistance in human and  
382 animal pathogens in Zambia, Democratic Republic of Congo, Mozambique and  
383 Tanzania: an urgent need of a sustainable surveillance system. *Ann Clin*  
384 *Microbiol Antimicrob*. 2013;12:28.
- 385 8. Aibinu IE, Ohaegbulam VC, Adenipekun EA, Ogunsola FT, Odugbemi TO, Mee  
386 BJ. Extended-spectrum beta-lactamase enzymes in clinical isolates of  
387 *Enterobacter* species from Lagos, Nigeria. *J Clin Microbiol*. 2003  
388 May;41(5):2197–200.
- 389 9. Holt KE, Wertheim H, Zadoks RN, Baker S, Whitehouse CA, Dance D, et al.  
390 Genomic analysis of diversity, population structure, virulence, and antimicrobial  
391 resistance in *Klebsiella pneumoniae*, an urgent threat to public health. *Proc Natl*  
392 *Acad Sci U S A*. 2015 Jul 7;112(27):E3574-81.
- 393 10. Adriaenssens N, Coenen S, Versporten A, Muller A, Vankerckhoven V,  
394 Goossens H, et al. European Surveillance of Antimicrobial Consumption  
395 (ESAC): quality appraisal of antibiotic use in Europe. *J Antimicrob Chemother*.

- 396 Oxford University Press; 2011 Dec;66 Suppl 6(suppl 6):vi71-77.
- 397 11. Miliani K, L'Hériteau F, Lacavé L, Carbonne A, Astagneau P, Antimicrobial  
398 Surveillance Network Study Group. Imipenem and ciprofloxacin consumption as  
399 factors associated with high incidence rates of resistant *Pseudomonas aeruginosa*  
400 in hospitals in northern France. *J Hosp Infect.* 2011 Apr;77(4):343–7.
- 401 12. Pournaras S, Koumaki V, Spanakis N, Gennimata V, Tsakris A. Current  
402 perspectives on tigecycline resistance in Enterobacteriaceae: susceptibility testing  
403 issues and mechanisms of resistance. *Int J Antimicrob Agents.* 2016  
404 Jul;48(1):11–8.
- 405 13. Osei Sekyere J, Govinden U, Bester LA, Essack SY. Colistin and tigecycline  
406 resistance in carbapenemase-producing Gram-negative bacteria: emerging  
407 resistance mechanisms and detection methods. *J Appl Microbiol.* 2016 May 7;
- 408 14. Zmarlicka MT, Nailor MD, Nicolau DP. Impact of the New Delhi metallo-beta-  
409 lactamase on beta-lactam antibiotics. *Infect Drug Resist.* 2015;8:297–309.
- 410 15. Findlay J, Hopkins KL, Doumith M, Meunier D, Wiuff C, Hill R, et al. KPC  
411 enzymes in the UK: an analysis of the first 160 cases outside the North-West  
412 region. *J Antimicrob Chemother.* 2016 May;71(5):1199–206.
- 413 16. Wright LL, Turton JF, Livermore DM, Hopkins KL, Woodford N. Dominance of  
414 international “high-risk clones” among metallo- $\beta$ -lactamase-producing  
415 *Pseudomonas aeruginosa* in the UK. *J Antimicrob Chemother.* 2015  
416 Jan;70(1):103–10.
- 417 17. European Committee on Antimicrobial Susceptibility Testing Breakpoint tables  
418 for interpretation of MICs and zone diameters. Accessed from:  
419 [http://www.eucast.org/fileadmin/src/media/PDFs/EUCAST\\_files/Breakpoint\\_tab](http://www.eucast.org/fileadmin/src/media/PDFs/EUCAST_files/Breakpoint_tab)

- 420           les/v\_5.0\_Breakpoint\_Table\_01.pdf
- 421    18.    Zerbino DR, Birney E. Velvet: algorithms for de novo short read assembly using  
422           de Bruijn graphs. *Genome Res.* 2008 May;18(5):821–9.
- 423    19.    Rissman AI, Mau B, Biehl BS, Darling AE, Glasner JD, Perna NT. Reordering  
424           contigs of draft genomes using the Mauve aligner. *Bioinformatics.* 2009 Aug  
425           15;25(16):2071–3.
- 426    20.    McArthur AG, Waglechner N, Nizam F, Yan A, Azad MA, Baylay AJ, et al. The  
427           comprehensive antibiotic resistance database. *Antimicrob Agents Chemother.*  
428           2013 Jul;57(7):3348–57.
- 429    21.    Antipov D, Hartwick N, Shen M, Raiko M, Lapidus A, Pevzner PA.  
430           plasmidSPAdes: Assembling Plasmids from Whole Genome Sequencing Data.  
431           *Bioinformatics.* 2016 Jul 27;
- 432    22.    Langmead B, Trapnell C, Pop M, Salzberg SL. Ultrafast and memory-efficient  
433           alignment of short DNA sequences to the human genome. *Genome Biol.*  
434           2009;10(3):R25.
- 435    23.    Rutherford K, Parkhill J, Crook J, Horsnell T, Rice P, Rajandream MA, et al.  
436           Artemis: sequence visualization and annotation. *Bioinformatics.* 2000  
437           Oct;16(10):944–5.
- 438    24.    Dortet L, Nordmann P, Poirel L. Association of the emerging carbapenemase  
439           NDM-1 with a bleomycin resistance protein in *Enterobacteriaceae* and  
440           *Acinetobacter baumannii*. *Antimicrob Agents Chemother.* 2012 Apr;56(4):1693–  
441           7.
- 442    25.    Hammad AM, Ishida Y, Shimamoto T. Prevalence and molecular  
443           characterization of ampicillin-resistant *Enterobacteriaceae* isolated from

- 444 traditional Egyptian Domiati cheese. *J Food Prot.* 2009 Mar;72(3):624–30.
- 445 26. Zioga A, Whichard JM, Kotsakis SD, Tzouvelekis LS, Tzelepi E, Miriagou V.  
446 CMY-31 and CMY-36 cephalosporinases encoded by ColE1-like plasmids.  
447 *Antimicrob Agents Chemother.* 2009 Mar;53(3):1256–9.
- 448 27. Tsakris A, Poulou A, Markou F, Pitiriga V, Piperaki E-T, Kristo I, et al.  
449 Dissemination of clinical isolates of *Klebsiella oxytoca* harboring CMY-31,  
450 VIM-1, and a New OXY-2-type variant in the community. *Antimicrob Agents*  
451 *Chemother.* 2011 Jul;55(7):3164–8.
- 452 28. Wu L-T, Tsou M-F, Wu H-J, Chen H-E, Chuang Y-C, Yu W-L. Survey of CTX-  
453 M-3 extended-spectrum  $\beta$ -lactamase (ESBL) among cefotaxime-resistant *Serratia*  
454 *marcescens* at a medical center in middle Taiwan. *Diagn Microbiol Infect Dis.*  
455 2004;49(2):125–9.
- 456 29. Jesumirhewe C, Springer B, Lepuschitz S, Allerberger F, Ruppitsch W.  
457 Carbapenemase-producing Enterobacteriaceae-isolates from Edo State, Nigeria.  
458 *Antimicrob Agents Chemother.* American Society for Microbiology; 2017 Aug  
459 12;61(8):AAC.00255-17.
- 460 30. Cerqueira GC, Earl AM, Ernst CM, Grad YH, Dekker JP, Feldgarden M, et al.  
461 Multi-institute analysis of carbapenem resistance reveals remarkable diversity,  
462 unexplained mechanisms, and limited clonal outbreaks. *Proc Natl Acad Sci.* 2017  
463 Jan 31;114(5):1135–40.
- 464 31. Economic Benefits from Air Transport in Nigeria Nigeria country report.
- 465 32. Walkty A, Gilmour M, Simner P, Embil JM, Boyd D, Mulvey M, et al. Isolation  
466 of multiple carbapenemase-producing Gram-negative bacilli from a patient  
467 recently hospitalized in Nigeria. *Diagn Microbiol Infect Dis.* 2015

- 468 Apr;81(4):296–8.
- 469 33. Giske CG, Fröding I, Hasan CM, Turlej-Rogacka A, Toleman M, Livermore D,  
470 et al. Diverse sequence types of *Klebsiella pneumoniae* contribute to the  
471 dissemination of bla<sub>NDM-1</sub> in India, Sweden, and the United Kingdom.  
472 *Antimicrob Agents Chemother.* 2012 May;56(5):2735–8.
- 473 34. Rashid M, Rakib MM, Hasan B. Antimicrobial-resistant and ESBL-producing  
474 *Escherichia coli* in different ecological niches in Bangladesh. *Infect Ecol*  
475 *Epidemiol.* 2015;5:26712.
- 476 35. Mushtaq S, Irfan S, Sarma JB, Doumith M, Pike R, Pitout J, et al. Phylogenetic  
477 diversity of *Escherichia coli* strains producing NDM-type carbapenemases. *J*  
478 *Antimicrob Chemother.* 2011 Sep;66(9):2002–5.
- 479 36. Samuelsen O, Toleman MA, Sundsfjord A, Rydberg J, Leegaard TM, Walder M,  
480 et al. Molecular epidemiology of metallo-beta-lactamase-producing  
481 *Pseudomonas aeruginosa* isolates from Norway and Sweden shows import of  
482 international clones and local clonal expansion. *Antimicrob Agents Chemother.*  
483 2010 Jan;54(1):346–52.
- 484 37. Tsutsui A, Suzuki S, Yamane K, Matsui M, Konda T, Marui E, et al. Genotypes  
485 and infection sites in an outbreak of multidrug-resistant *Pseudomonas aeruginosa*.  
486 *J Hosp Infect.* 2011 Aug;78(4):317–22.
- 487 38. Koh TH, Khoo CT, Tan TT, Arshad MABM, Ang LP, Lau LJ, et al. Multilocus  
488 sequence types of carbapenem-resistant *Pseudomonas aeruginosa* in Singapore  
489 carrying metallo-beta-lactamase genes, including the novel bla(IMP-26) gene. *J*  
490 *Clin Microbiol.* 2010 Jul;48(7):2563–4.
- 491 39. Empel J, Filczak K, Mrówka A, Hryniewicz W, Livermore DM, Gniadkowski M.

- 492           Outbreak of *Pseudomonas aeruginosa* infections with PER-1 extended-spectrum  
493           beta-lactamase in Warsaw, Poland: further evidence for an international clonal  
494           complex. *J Clin Microbiol*. 2007 Sep;45(9):2829–34.
- 495   40.   Fonseca EL da, Freitas F dos S, Vicente ACP. The colistin-only-sensitive  
496           Brazilian *Pseudomonas aeruginosa* clone SP (sequence type 277) is spread  
497           worldwide. *Antimicrob Agents Chemother*. 2010 Jun;54(6):2743.
- 498   41.   García-Castillo M, Del Campo R, Morosini MI, Riera E, Cabot G, Willems R, et  
499           al. Wide dispersion of ST175 clone despite high genetic diversity of carbapenem-  
500           nonsusceptible *Pseudomonas aeruginosa* clinical strains in 16 Spanish hospitals. *J*  
501           *Clin Microbiol*. 2011 Aug;49(8):2905–10.
- 502   42.   Lee J-Y, Song J-H, Ko KS. Identification of nonclonal *Pseudomonas aeruginosa*  
503           isolates with reduced colistin susceptibility in Korea. *Microb Drug Resist*. 2011  
504           Jun;17(2):299–304.
- 505   43.   Nemec A, Krizova L, Maixnerova M, Musilek M. Multidrug-resistant epidemic  
506           clones among bloodstream isolates of *Pseudomonas aeruginosa* in the Czech  
507           Republic. *Res Microbiol*. 2010 Apr;161(3):234–42.
- 508   44.   Liakopoulos A, Mavroidi A, Katsifas EA, Theodosiou A, Karagouni AD,  
509           Miriagou V, et al. Carbapenemase-producing *Pseudomonas aeruginosa* from  
510           central Greece: molecular epidemiology and genetic analysis of class I integrons.  
511           *BMC Infect Dis*. 2013;13:505.
- 512   45.   Edelstein M V, Skleenova EN, Shevchenko O V, D'souza JW, Tapalski D V,  
513           Azizov IS, et al. Spread of extensively resistant VIM-2-positive ST235  
514           *Pseudomonas aeruginosa* in Belarus, Kazakhstan, and Russia: a longitudinal  
515           epidemiological and clinical study. *Lancet Infect Dis*. 2013 Oct;13(10):867–76.

- 516 46. Chen Y, Sun M, Wang M, Lu Y, Yan Z. Dissemination of IMP-6-producing  
517 *Pseudomonas aeruginosa* ST244 in multiple cities in China. *Eur J Clin Microbiol*  
518 *Infect Dis.* 2014 Jul;33(7):1181–7.
- 519 47. Moyo S, Haldorsen B, Aboud S, Blomberg B, Maselle SY, Sundsfjord A, et al.  
520 Identification of VIM-2-producing *Pseudomonas aeruginosa* from Tanzania is  
521 associated with sequence types 244 and 640 and the location of blaVIM-2 in a  
522 TniC integron. *Antimicrob Agents Chemother.* 2015 Jan;59(1):682–5.
- 523 48. Vatcheva-Dobrevska R, Mulet X, Ivanov I, Zamorano L, Dobрева E, Velinov T,  
524 et al. Molecular epidemiology and multidrug resistance mechanisms of  
525 *Pseudomonas aeruginosa* isolates from Bulgarian hospitals. *Microb Drug Resist.*  
526 2013 Oct;19(5):355–61.
- 527
- 528
- 529



530 **Table 1. Distribution and sources of bacterial isolates**

| <b>Specimen</b> | <b><i>Klebsiella</i> spp.</b> | <b><i>E. coli</i></b> | <b><i>Pseudomonas</i> spp.</b> | <b><i>Proteus</i> spp.</b> | <b>Others</b> | <b>Total</b> |
|-----------------|-------------------------------|-----------------------|--------------------------------|----------------------------|---------------|--------------|
| Wound           | 44                            | 09                    | 24                             | 10                         | 0             | 86           |
| Urine           | 36                            | 26                    | 08                             | 04                         | 1             | 76           |
| B/culture       | 08                            | 03                    | 0                              | 0                          | 0             | 11           |
| Sputum          | 07                            | 02                    | 01                             | 01                         | 03            | 14           |
| HVS/ECS         | 02                            | 03                    | 0                              | 0                          | 0             | 05           |
| Ear swab        | 06                            | 0                     | 15                             | 08                         | 0             | 29           |
| Catheter        | 06                            | 01                    | 02                             | 0                          | 0             | 09           |
| Aspirate        | 04                            | 0                     | 03                             | 0                          | 0             | 07           |
| Others          | 0                             | 0                     | 01                             | 0                          | 0             | 01           |
| Total           | 113                           | 44                    | 54                             | 23                         | 04            | 238          |
| *Stool          | 09                            | 52                    | 06                             | 01                         | 0             | 68           |
| Total           | 122                           | 96                    | 60                             | 24                         | 04            | <b>306</b>   |

(Overall)

531 \*Stool samples are from healthy carriers; B/culture, Blood culture; HVS/ECS, High  
 532 vaginal swab/Endocervical swab

533 **Table 2. Summary of antimicrobial disk susceptibility testing of 306 bacterial**  
534 **isolates**

| <b>Organism, n</b>          | <b>FQ</b> |           | <b>3GS</b> |            | <b>CARB</b> |           |
|-----------------------------|-----------|-----------|------------|------------|-------------|-----------|
|                             | <b>S</b>  | <b>R</b>  | <b>S</b>   | <b>R</b>   | <b>S</b>    | <b>R</b>  |
| <i>K. pneumoniae</i> , 122  | 30 (24.6) | 92 (75.4) | 09 (7.4)   | 113 (92.6) | 60 (49.2)   | 62 (50.8) |
| <i>E. coli</i> , 96,        | 18 (18.6) | 78 (81.4) | 06 (6.3)   | 90 (93.7)  | 39 (40.6)   | 57 (59.4) |
| <i>Pseudomonas</i> spp., 60 | 14 (23.3) | 46 (76.7) | 5 (8.3)    | 55 (91.7)  | 29 (48.3)   | 31 (51.7) |
| <i>Proteus</i> spp., 24     | 4 (16.7)  | 20 (83.3) | 3 (12.5)   | 21 (87.5)  | 13 (54.2)   | 11 (45.8) |
| Others, 04                  | 01 (25.0) | 03 (75.0) | 01 (25.0)  | 03 (75.0)  | 04 (100)    | 0 (0)     |

535 FQ, fluoroquinolone; 3GC, third generation cephalosporin; CARB, carbapenem; (),

536 number in parentheses are percentages

537

538 **Table 3. Overview of susceptibility testing to clinically important antibiotics**

539

|                             | Number of isolates | Percentage of isolates resistant |      |      |
|-----------------------------|--------------------|----------------------------------|------|------|
|                             |                    | FQ                               | 3GC  | CARB |
| Total isolates              | 306                | 78.1                             | 92.2 | 52.6 |
| Clinical samples            | 238                | 80.4                             | 90   | 47.8 |
| Stool (healthy individuals) | 68                 | 69.1                             | 100  | 69.1 |
| <i>Klebsiella</i> spp       | 122                | 75.4                             | 92.6 | 50.8 |
| <i>E. coli</i>              | 96                 | 81.4                             | 93.7 | 59.4 |
| <i>Pseudomonas</i> spp      | 60                 | 76.7                             | 91.7 | 51.7 |
| <i>Proteus</i> spp          | 24                 | 83.3                             | 87.5 | 45.8 |
| Others                      | 4                  | 75.0                             | 75.0 | 0    |
| 2011                        | 182                | 78.5                             | 96.6 | 59.3 |
| 2013                        | 124                | 76.9                             | 86.8 | 43.0 |
| Hospital I (UCH)            | 212                | 80.9                             | 100  | 50   |
| Hospital II (OOUTH)         | 6                  | 83.3                             | 100  | 50   |
| Hospital III (OAUTHC)       | 20                 | 75                               | 90   | 55   |

540 FQ, fluoroquinolone; 3GC, third generation cephalosporin; CARB, carbapene

541 **Table 4. Strain types, beta-lactamase genes and plasmid replicons present in representative isolates**

542

| Strain | Species              | Sequence Type | MIC ( $\mu\text{g}/\text{dl}$ ) |      |      | Carbapenemase gene | Beta-lactamase genes     | Plasmid replicons identified |
|--------|----------------------|---------------|---------------------------------|------|------|--------------------|--------------------------|------------------------------|
|        |                      |               | IMP                             | MER  | ETP  |                    |                          |                              |
| U37    | <i>K. pneumoniae</i> | ST11          | 16                              | 16   | 64   | NDM-1              | OXA-1, SHV-11, CTX-M-15, | FIB (K), FII (K)             |
| U52    | <i>K. pneumoniae</i> | ST11          | 16                              | 16   | 64   | NDM-1              | OXA-1, SHV-11, CTX-M-15, | FIB (K), FII (K)             |
| S46    | <i>E. coli</i>       | ST226         | 16                              | 0.12 | 0.12 | -                  | AmpC, TEM-1              | FII                          |
| F124   | <i>E. coli</i>       | ST156         | 0.5                             | 0.06 | 0.06 | -                  | TEM-1, ACT-7             | Q1                           |
| F19    | <i>P. aeruginosa</i> | ST244         | 8                               | 8    | NA   | PDC-1              | -                        | -                            |
| F46    | <i>P. aeruginosa</i> | ST233         | 32                              | 64   | NA   | VIM-2, PDC-3       | OXA-33                   | -                            |
| U36    | <i>P. aeruginosa</i> | ST233         | 64                              | 32   | NA   | VIM-2, PDC-3       | OXA-33                   | -                            |
| F10    | <i>P. mirabilis</i>  | -             | 8                               | 0.25 | 2    | -                  | CMY-41, CMY-31, TEM-1    | Q1                           |
| F56    | <i>P. mirabilis</i>  | -             | 8                               | 0.25 | 0.25 | -                  | ACT-7, TEM-1             | Q1, Col(BS512)               |
| S39    | <i>P. rettgeri</i>   | -             | 16                              | 2    | 4    | -                  | SRT-2                    | -                            |

543 - Indicates no gene or replicon detected, for sequence type a species where no MLST scheme has been established. N/A;

544 *Pseudomonas* are intrinsically resistant to ertapenem so no MIC values were determined.

545 **Figure Legends**

546 **Figure 1.** Pie charts show the proportion of isolates classified as resistant (**R**) or  
547 sensitive (**S**) to fluoroquinolones (FQ, blue and red), third generation cephalosporins  
548 (3GC, red and white) and carbapenems (Carb, green and yellow). The left hand of the  
549 figure shows data from the whole study (including all species and both years). The  
550 expanded insert (right side) shows data from each of the three hospitals (grey circles).

551 **Figure 2.** RAPD analysis of a selection of isolates of *E. coli*. The bold line above the  
552 gel shows isolates with an identical banding pattern.

553 **Figure 3.** Plasmid content reconstructed using PLACNET. Panel **A** shows network  
554 from *P. aeruginosa* F46 with a chromosomal network of 60 contigs totalling ~6.7MB  
555 and three discrete plasmid networks; P1 and P2 both <5kb and P3, carrying VIM-2  
556 consisting of 8 contigs of ~31kb. The *bla*VIM-2 gene in *Pseudomonas* was present on a  
557 small contig with homology to an integron. Trimethoprim and aminoglycoside  
558 resistance genes were also present in the assembled contig. Panel **B** shows network from  
559 *K. pneumoniae* U52 with a chromosomal group of 87 contigs totalling 5.3MB and 4  
560 plasmid networks; P1 and P3 both ~5kb, P2 of 9kb and P4 a large network of 90 contigs  
561 totalling 1.9 MB which is likely to represent more than one IncF type plasmids which  
562 have not been resolved. The *bla*<sub>NDM-1</sub> gene in U52 was on a small contig in an operon  
563 with the *ble* gene. Immediately downstream were the *trpF*, *dsbC* and *cutA* genes.

564

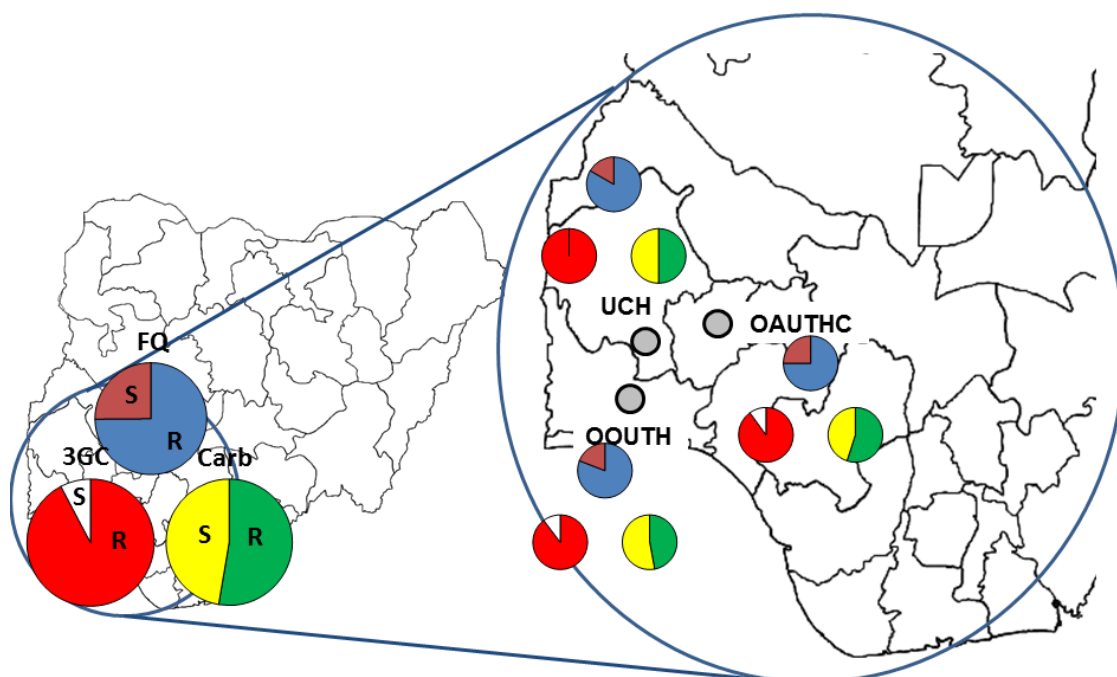

**Figure 1.** Summary of resistance to fluoroquinolones (FQ), carbapenems (Carb) and third generation cephalosporins (3GC) in South West Nigeria. Pie charts indicate the percentage of sensitive (S) and resistant (R) amongst all isolates from all three regions (left half of diagram) or the three individual study sites (right half). The study hospitals are marked by grey circles.

565

566

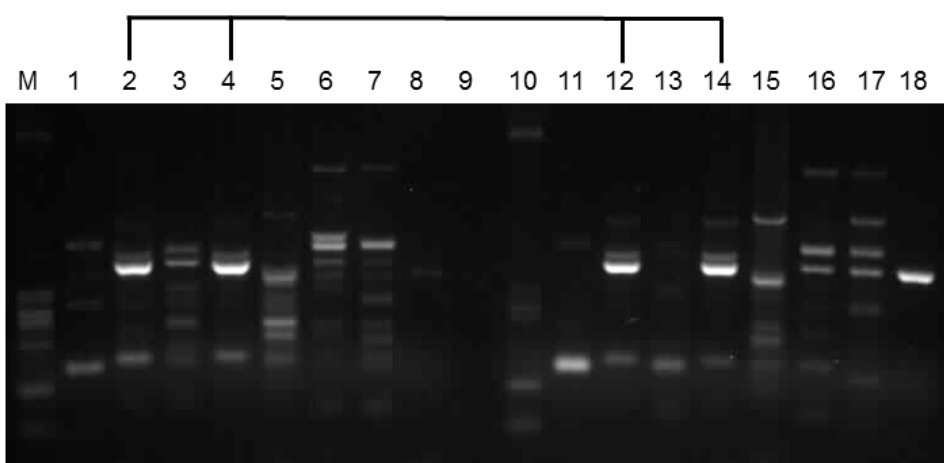

**Figure 2.** RAPD analysis of 18 *E. coli* isolates. Agarose gel electrophoresis of amplimers from RAPD-PCR. M, marker. The bold line above the gel indicates the 4 isolates with an identical banding pattern.

567

568

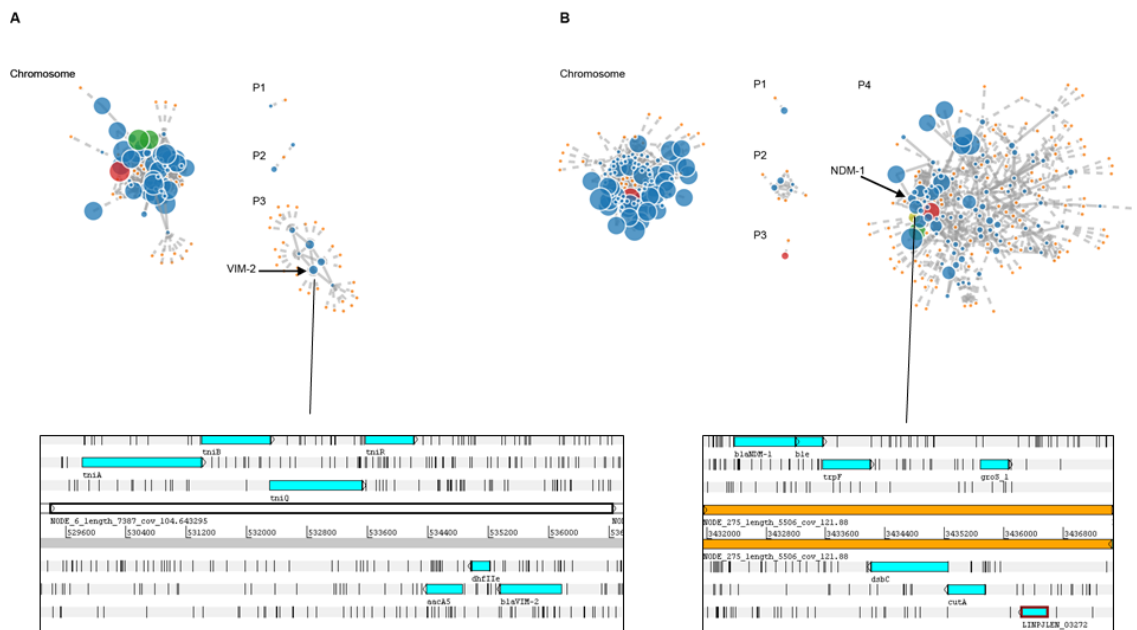

569

570 **Figure 3.** Plasmid content reconstructed using PLACNET. Panel A shows network  
571 from *P. aeruginosa* F46 with a chromosomal network of 60 contigs totalling ~6.7MB  
572 and three discrete plasmid networks; P1 and P2 both <5kb and P3, carrying VIM-2  
573 consisting of 8 contigs of ~31kb. The *bla*<sub>VIM-2</sub> gene in *Pseudomonas* was present on a  
574 small contig with homology to an integron. Trimethoprim and aminoglycoside  
575 resistance genes were also present in the assembled contig. Panel B shows network from  
576 *K. pneumoniae* U52 with a chromosomal group of 87 contigs totalling 5.3MB and 4  
577 plasmid networks; P1 and P3 both ~5kb, P2 of 9kb and P4 a large network of 90 contigs  
578 totalling 1.9 MB which is likely to represent more than one IncF type plasmids which  
579 have not been resolved. The *bla*<sub>NDM-1</sub> gene in U52 was on a small contig in an operon  
580 with the *ble* gene. Immediately downstream were the *trpF*, *dsbC* and *cutA* genes.  
581



582 **Table (S1). Primers used in this study for the amplification of carbapenemase genes**

| Forward Primer | Sequence (5'-3')             | Reverse primer | Sequence (3'-5')            | Annealing temp (°C) | Product size (bp) |
|----------------|------------------------------|----------------|-----------------------------|---------------------|-------------------|
| OXA-48         | TTCGGCCACGGAGCAAATCAG        | OXA-48         | GATGTGGGCATATCCATATTCATCGCA | 56                  | 240               |
| IMP            | CTACCGCAGCAGAGTCTTTG         | OXA-48         | AACCAGTTTTGCCTTACCAT        | 56                  | 587               |
| IMI            | GAGGGTATGACTAAATTCATGCGGTCGA | IMI            | GCAGGTGTAGATGTGTACGTCATCG   | 58                  | 116               |
| KPC            | ATGTCACTGTATCGCCGTCT         | KPC            | TAGACGGCCAACACAATAGG        | 56                  | 785               |
| NDM            | TTGATGCTGAGCGGGTG            | NDM            | CTGTCCTTGATCAGGCAGC         | 56                  | 578               |
| VIM            | AGTGGTGAGTATCCGACAG          | VIM            | ATGAAAGTGCGTGGAGAC          | 56                  | 261               |
| GES            | CGGTTTCTAGCATCGGGACACAT      | GES            | CCGCCATAGAGGACTTTAGCACAG    | 58                  | 263               |
| SME            | AACGGCTTCATTTTTGTTTAG        | SME            | GCTTCCGCAATAGTTTTATCA       | 58                  | 830               |

583

584

585

586
